# Supplementary material for: Optimal Solution to the Torsional Coefficient Fitting Problem in Force Field Parametrization
Source: PubMed Central journal article supplement (PMC8041298; doi:10.1021/acs.jpca.0c10845), 2021-03-24
Supplement: jp0c10845_si_001.pdf [file jp0c10845_si_001.pdf]

# Supporting Information for Publication: “Optimal Solution to Torsional Coefficients Fitting Problem in Force Fields Parametrization”

Adrian Kania, Krzysztof Sarapata, Michał Gucwa, Anna Wójcik-Augustyn\*

Department of Computational Biophysics and Bioinformatics, Faculty of Biochemistry, Biophysics and  
Biotechnology, Jagiellonian University ul. Gronostajowa 7, 30-387 Cracow, Poland

## 1. The github repository containing *K\_fit.py* program and its description:

[https://github.com/mysarapa/K\\_fit](https://github.com/mysarapa/K_fit)

## 2. Sample of energy profiles for all dihedral angles comparing torsional coefficients derived from *K\_fit.py* (algebraic approach) and *fit\_dihedral.py* (Monte Carlo method) programs.

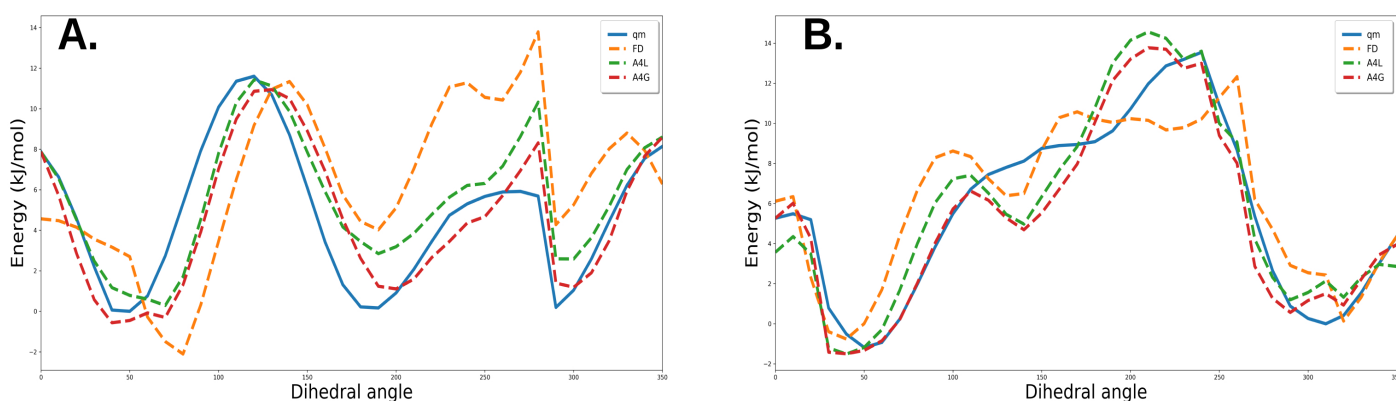

Figure S1: Energy profiles for two dihedral angles in dimethyl phosphoric acid of CT-OS-P-OS type. FD refers to the results of fitting of Fourier coefficients based on the Monte Carlo simulations using *fitdihedral.py* program (Guvench, 2008). A4L (set 3 in Table 1) and A4G (set 4 in Table 1) were obtained using four-parameter algebraic method (local and global, respectively).

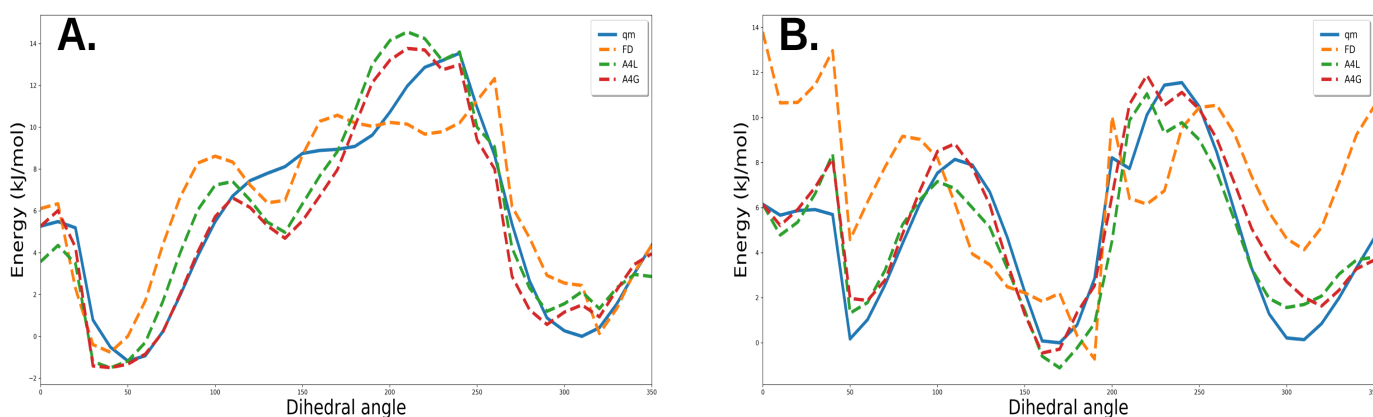

Figure S2: Energy profiles for two dihedral angles in dimethyl phosphoric acid of CT-OS-P-O2 type. FD refers to the results of fitting of Fourier coefficients based on the Monte Carlo simulations using *fitdihedral.py* program (Guvench, 2008). A4L (set 3 in Table 1) and A4G (set 4 in Table 1) were obtained using four-parameter algebraic method (local and global, respectively).

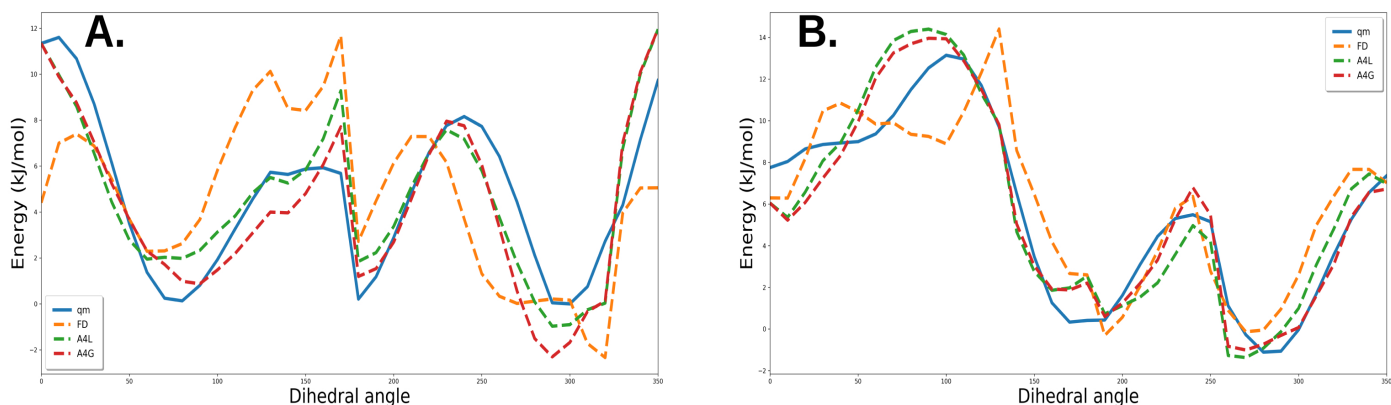

Figure S3: Energy profiles for two dihedral angles in dimethyl phosphoric acid of CT-OS-P-OH type. FD refers to the results of fitting of Fourier coefficients based on the Monte Carlo simulations using *fitdihedral.py* program (Guvench, 2008). A4L (set 3 in Table 1) and A4G (set 4 in Table 1) were obtained using four-parameter algebraic method (local and global, respectively).

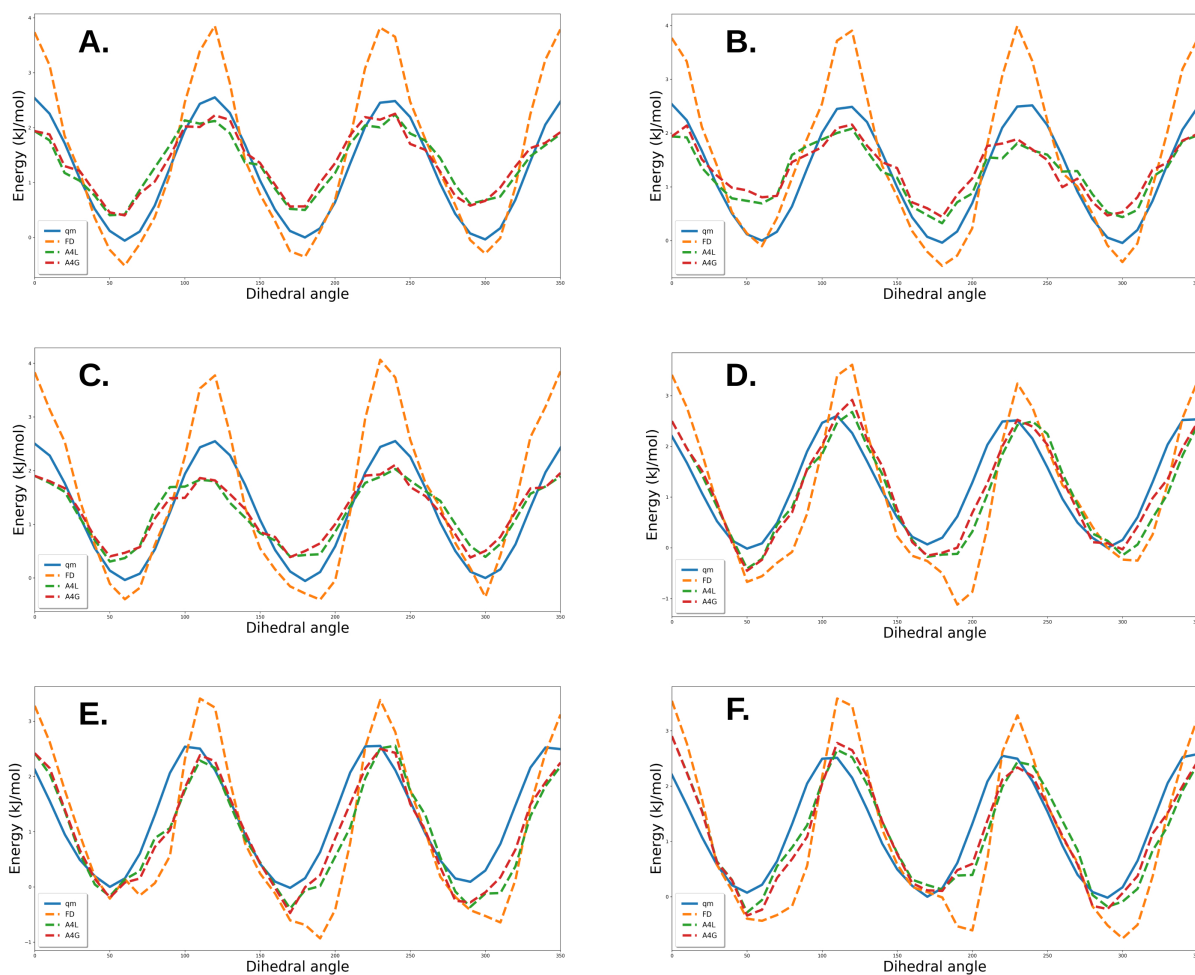

Figure S4: Energy profiles for six dihedral angles in dimethyl phosphoric acid of HC-CT-OS-P type. FD refers to the results of fitting of Fourier coefficients based on the Monte Carlo simulations using *fitdihedral.py* program (Guvench, 2008). A4L (set 3 in Table 1) and A4G (set 4 in Table 1) were obtained using four-parameter algebraic method (local and global, respectively).

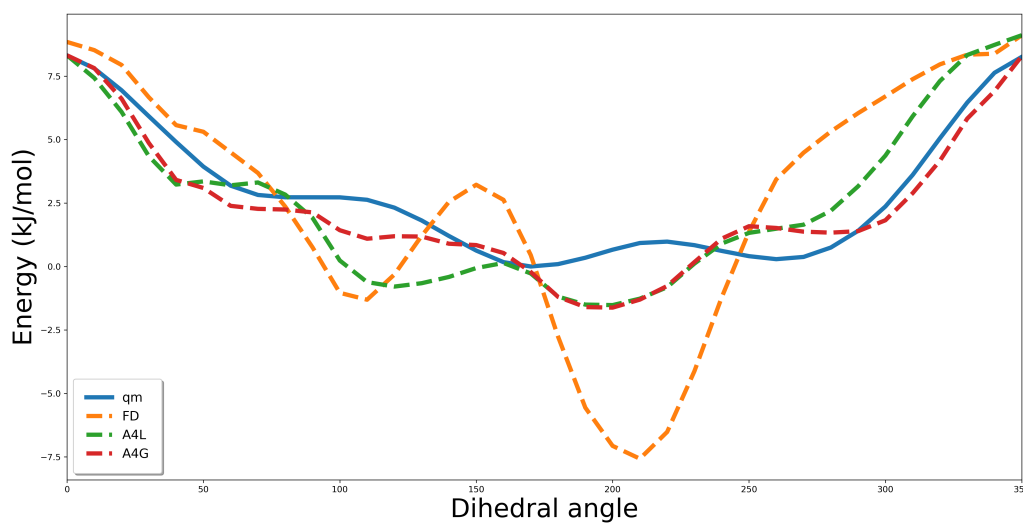

Figure S5: Energy profiles for dihedral angle in dimethyl phosphoric acid of HO-OH-P-O2 type. FD refers to the results of fitting of Fourier coefficients based on the Monte Carlo simulations using `fitdihedral.py` program (Guvench, 2008). A4L (set 3 in Table 1) and A4G (set 4 in Table 1) were obtained using four-parameter algebraic method (local and global, respectively).

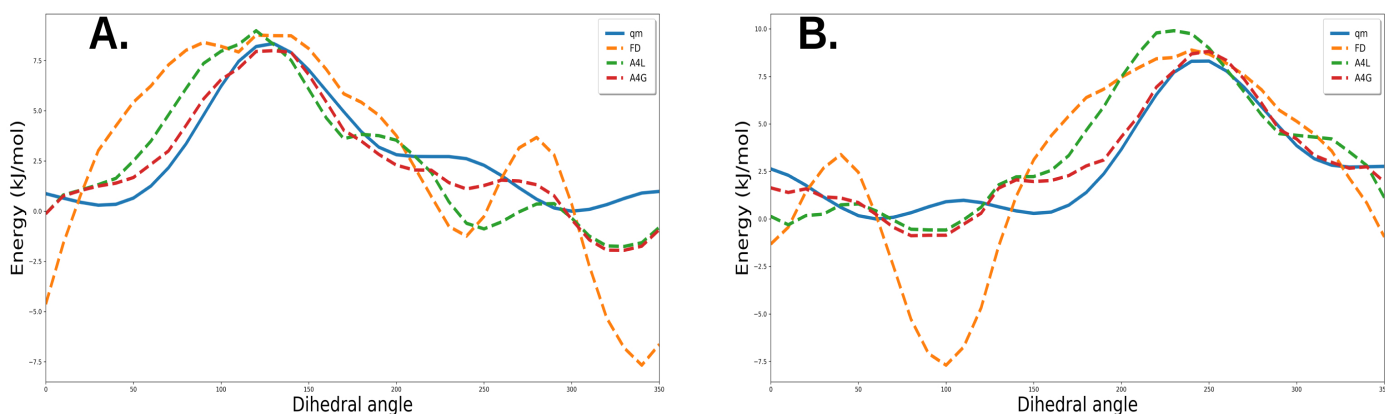

Figure S6: Energy profiles for two dihedral angles in dimethyl phosphoric acid of HO-OH-P-OS type. FD refers to the results of fitting of Fourier coefficients based on the Monte Carlo simulations using `fitdihedral.py` program (Guvench, 2008). A4L (set 3 in Table 1) and A4G (set 4 in Table 1) were obtained using four-parameter algebraic method (local and global, respectively).

**Table 1. Considered sets of parameters.**

| <b>Set name</b> | <b>Set type</b> | <b>vdW parameters</b> | <b>Charges values</b> | <b>Minimization type</b> | <b>Number of parameters</b> |
|-----------------|-----------------|-----------------------|-----------------------|--------------------------|-----------------------------|
| Set1            | 1               | ORG                   | Q0                    | L                        | 3                           |
| Set2            | 1               | ORG                   | Q0                    | G                        | 3                           |
| Set3            | 1               | ORG                   | Q0                    | L                        | 4                           |
| Set4            | 1               | ORG                   | Q0                    | G                        | 4                           |
| Set5            | 2               | ORG                   | Qopls                 | L                        | 4                           |
| Set6            | 2               | ORG                   | Qopls                 | L                        | 3                           |
| Set7            | 2               | ORG                   | Qopls                 | G                        | 4                           |
| Set8            | 2               | ORG                   | Qopls                 | G                        | 3                           |
| Set9            | 3               | M                     | Q0                    | L                        | 3                           |
| Set10           | 3               | M                     | Q0                    | G                        | 3                           |
| Set11           | 3               | M                     | Q0                    | L                        | 4                           |
| Set12           | 3               | M                     | Q0                    | G                        | 4                           |
| Set13           | 4               | M                     | M                     | L                        | 3                           |
| Set14           | 4               | M                     | M                     | G                        | 3                           |
| Set15           | 4               | M                     | M                     | L                        | 4                           |
| Set16           | 4               | M                     | M                     | G                        | 4                           |

Summarizing, 16 sets of parameters were tested. There were 4 types of set differing in van der Waals parameters and partial charges. We performed both local (L) and global (G) minimization searching for 3 and 4 Fourier coefficients for each dihedral type.

### 3. Sets of partial charges and van der Waals parameters used in the study:

Q0

| nonbonded_atom type | bonded_atom_type | charges |
|---------------------|------------------|---------|
| opls_135            | CT               | -0.045  |
| opls_140            | HC               | 0.096   |
| opls_140            | HC               | 0.096   |
| opls_140            | HC               | 0.096   |
| opls_395            | OS               | -0.331  |
| opls_393            | P                | 0.945   |
| opls_394            | O2               | -0.550  |
| opls_268            | OH               | -0.652  |
| opls_270            | HO               | 0.433   |
| opls_395            | OS               | -0.331  |
| opls_135            | CT               | -0.045  |
| opls_140            | HC               | 0.096   |
| opls_140            | HC               | 0.096   |
| opls_140            | HC               | 0.096   |

Qopls

| nonbonded_atom type | bonded_atom_type | charges |
|---------------------|------------------|---------|
| opls_135            | CT               | 0.190   |
| opls_140            | HC               | 0.060   |
| opls_140            | HC               | 0.060   |
| opls_140            | HC               | 0.060   |
| opls_395            | OS               | -0.470  |
| opls_393            | P                | 1.270   |
| opls_394            | O2               | -0.790  |
| opls_268            | OH               | -0.700  |
| opls_270            | HO               | 0.420   |
| opls_395            | OS               | -0.470  |
| opls_135            | CT               | 0.190   |
| opls_140            | HC               | 0.060   |
| opls_140            | HC               | 0.060   |
| opls_140            | HC               | 0.060   |

M

| nonbonded_atom type | bonded_atom_type | charges |
|---------------------|------------------|---------|
| opls_443            | CT               | 0.430   |
| opls_444            | HC               | -0.030  |
| opls_444            | HC               | -0.030  |
| opls_444            | HC               | -0.030  |
| opls_442            | OS               | -0.470  |
| opls_440            | P                | 1.270   |
| opls_441            | O2               | -0.790  |
| opls_268            | OH               | -0.640  |
| opls_270            | HO               | 0.420   |
| opls_442            | OS               | -0.470  |
| opls_443            | CT               | 0.430   |
| opls_444            | HC               | -0.030  |
| opls_444            | HC               | -0.030  |
| opls_444            | HC               | -0.030  |

vdW parameters - M

|          |    | sigma       | epsilon |
|----------|----|-------------|---------|
| opls_440 | P  | 3.74000e-01 | 0.58576 |
| opls_441 | O2 | 3.15000e-01 | 0.71128 |
| opls_442 | OS | 2.90000e-01 | 0.50208 |
| opls_268 | OH | 3.10000e-01 | 0.58576 |

#### 4. Sets of coefficients of Ryckaert Bellmans potential applied in the study:

RB for DIHEDRALS

-----  
assigned with *K\_fit.py*

##### SET TYPE 1

SET1 (ORIG, Q0, L-3)-----RMSD= 1.3700 kJ/mol

|    |    |    |    |   |        |        |        |        |      |      |
|----|----|----|----|---|--------|--------|--------|--------|------|------|
| CT | OS | P  | OS | 3 | 7.56   | -36.00 | -40.00 | 28.44  | 0.00 | 0.00 |
| CT | OS | P  | OH | 3 | 7.92   | -48.68 | -37.64 | 40.76  | 0.00 | 0.00 |
| CT | OS | P  | O2 | 3 | 38.59  | 35.77  | -25.82 | -74.36 | 0.00 | 0.00 |
| HC | CT | OS | P  | 3 | -7.21  | 7.97   | -19.30 | -0.76  | 0.00 | 0.00 |
| HO | OH | P  | O2 | 3 | -18.32 | 3.91   | -29.62 | 14.40  | 0.00 | 0.00 |
| HO | OH | P  | OS | 3 | -16.96 | 29.12  | -39.66 | -12.16 | 0.00 | 0.00 |

SET2 (ORIG, Q0, G-3)-----RMSD= 1.1110 kJ/mol

|    |    |    |    |   |        |        |        |        |      |      |
|----|----|----|----|---|--------|--------|--------|--------|------|------|
| CT | OS | P  | OS | 3 | 30.47  | -20.07 | -35.94 | -10.40 | 0.00 | 0.00 |
| CT | OS | P  | OH | 3 | 32.06  | -32.22 | -31.96 | 0.16   | 0.00 | 0.00 |
| CT | OS | P  | O2 | 3 | 35.59  | -33.47 | -23.24 | -2.12  | 0.00 | 0.00 |
| HC | CT | OS | P  | 3 | 6.23   | -5.79  | -0.56  | -0.44  | 0.00 | 0.00 |
| HO | OH | P  | O2 | 3 | -90.16 | 103.84 | -39.38 | -13.68 | 0.00 | 0.00 |
| HO | OH | P  | OS | 3 | -89.18 | 86.90  | -55.58 | 2.28   | 0.00 | 0.00 |

SET3 (ORIG, Q0, L-4)-----RMSD= 1.2850 kJ/mol

|    |    |    |    |   |        |        |         |        |        |      |
|----|----|----|----|---|--------|--------|---------|--------|--------|------|
| CT | OS | P  | OS | 3 | 4.64   | -35.98 | -27.92  | 28.32  | -12.08 | 0.00 |
| CT | OS | P  | OH | 3 | 6.92   | -45.52 | -26.82  | 36.00  | -10.40 | 0.00 |
| CT | OS | P  | O2 | 3 | 31.77  | 32.35  | -2.78   | -69.80 | -22.72 | 0.00 |
| HC | CT | OS | P  | 3 | -13.97 | 20.75  | -27.00  | -1.00  | 23.12  | 0.00 |
| HO | OH | P  | O2 | 3 | -4.14  | -8.50  | -103.68 | 30.96  | 73.28  | 0.00 |
| HO | OH | P  | OS | 3 | -2.91  | 36.29  | -86.64  | -21.72 | 46.64  | 0.00 |

SET4 (ORIG, Q0, G-4)-----RMSD= 1.0570 kJ/mol

|    |    |    |    |   |        |        |        |        |        |      |
|----|----|----|----|---|--------|--------|--------|--------|--------|------|
| CT | OS | P  | OS | 3 | 12.23  | -24.00 | -23.70 | 5.28   | -27.68 | 0.00 |
| CT | OS | P  | OH | 3 | 12.29  | -33.03 | -13.42 | 12.36  | -33.52 | 0.00 |
| CT | OS | P  | O2 | 3 | 19.43  | -5.05  | 20.86  | -27.48 | -52.40 | 0.00 |
| HC | CT | OS | P  | 3 | 22.18  | -18.38 | -14.32 | -0.56  | 12.96  | 0.00 |
| HO | OH | P  | O2 | 3 | -69.90 | 109.12 | -79.86 | -28.20 | 44.08  | 0.00 |
| HO | OH | P  | OS | 3 | -78.86 | 77.34  | -80.88 | 9.08   | 30.24  | 0.00 |

-----  
SET TYPE 2

SET5 (ORIG, Qopls, L-4)-----RMSD= 1.9000 kJ/mol

|    |    |    |    |   |       |        |         |        |        |      |
|----|----|----|----|---|-------|--------|---------|--------|--------|------|
| CT | OS | P  | OS | 3 | -4.82 | -36.84 | -12.72  | 34.84  | -27.28 | 0.00 |
| CT | OS | P  | OH | 3 | -2.57 | -46.67 | -17.30  | 44.08  | -20.64 | 0.00 |
| CT | OS | P  | O2 | 3 | 27.60 | 40.78  | 20.00   | -80.00 | -46.48 | 0.00 |
| HC | CT | OS | P  | 3 | 13.59 | -12.13 | 6.18    | 0.44   | 7.60   | 0.00 |
| HO | OH | P  | O2 | 3 | 14.70 | -30.64 | -183.06 | 53.80  | 151.44 | 0.00 |
| HO | OH | P  | OS | 3 | 12.48 | 45.86  | -134.28 | -34.48 | 95.44  | 0.00 |

SET6 (ORIG, Qopls, L-3)-----RMSD= 2.1710 kJ/mol

|    |    |    |    |   |        |        |        |        |      |      |
|----|----|----|----|---|--------|--------|--------|--------|------|------|
| CT | OS | P  | OS | 3 | 2.47   | -33.75 | -17.36 | 31.28  | 0.00 | 0.00 |
| CT | OS | P  | OH | 3 | 1.78   | -50.38 | -16.10 | 48.60  | 0.00 | 0.00 |
| CT | OS | P  | O2 | 3 | 40.00  | 40.00  | -13.80 | -80.00 | 0.00 | 0.00 |
| HC | CT | OS | P  | 3 | 19.97  | -20.09 | -12.74 | 0.12   | 0.00 | 0.00 |
| HO | OH | P  | O2 | 3 | -22.34 | -25.54 | -31.72 | 47.88  | 0.00 | 0.00 |
| HO | OH | P  | OS | 3 | -12.62 | 42.14  | -40.00 | -29.52 | 0.00 | 0.00 |

SET7 (ORIG, Qopls, G-4)-----RMSD= 1.3890 kJ/mol

|    |    |    |    |   |         |        |        |        |        |      |
|----|----|----|----|---|---------|--------|--------|--------|--------|------|
| CT | OS | P  | OS | 3 | 25.73   | -48.93 | -13.74 | 13.56  | -38.56 | 0.00 |
| CT | OS | P  | OH | 3 | 25.29   | -59.99 | -2.14  | 23.40  | -45.20 | 0.00 |
| CT | OS | P  | O2 | 3 | 45.35   | -17.13 | 42.62  | -46.60 | -73.52 | 0.00 |
| HC | CT | OS | P  | 3 | 55.44   | -53.04 | 1.80   | 0.24   | 10.56  | 0.00 |
| HO | OH | P  | O2 | 3 | -111.91 | 161.21 | -89.48 | -36.00 | 53.20  | 0.00 |
| HO | OH | P  | OS | 3 | -123.03 | 118.71 | -88.64 | 13.40  | 36.32  | 0.00 |

SET8 (ORIG, Qopls, G-3)-----RMSD= 1.4590 kJ/mol

|    |    |    |    |   |         |        |        |        |      |      |
|----|----|----|----|---|---------|--------|--------|--------|------|------|
| CT | OS | P  | OS | 3 | 53.30   | -41.18 | -33.72 | -12.12 | 0.00 | 0.00 |
| CT | OS | P  | OH | 3 | 54.15   | -57.03 | -29.34 | 2.88   | 0.00 | 0.00 |
| CT | OS | P  | O2 | 3 | 67.47   | -62.87 | -21.22 | -4.60  | 0.00 | 0.00 |
| HC | CT | OS | P  | 3 | 37.38   | -37.62 | 6.88   | 0.24   | 0.00 | 0.00 |
| HO | OH | P  | O2 | 3 | -140.84 | 154.96 | -38.38 | -14.12 | 0.00 | 0.00 |
| HO | OH | P  | OS | 3 | -137.85 | 134.81 | -55.08 | 3.04   | 0.00 | 0.00 |

-----  
SET TYPE 3

SET9 (M, Q0, L-3)-----RMSD= 1.3550 kJ/mol

|    |    |    |    |   |        |        |        |        |      |      |
|----|----|----|----|---|--------|--------|--------|--------|------|------|
| CT | OS | P  | OS | 3 | 7.99   | -37.91 | -40.00 | 29.92  | 0.00 | 0.00 |
| CT | OS | P  | OH | 3 | 7.73   | -49.93 | -38.70 | 42.20  | 0.00 | 0.00 |
| CT | OS | P  | O2 | 3 | 39.29  | 37.87  | -26.74 | -77.16 | 0.00 | 0.00 |
| HC | CT | OS | P  | 3 | 11.44  | -11.72 | 16.96  | 0.28   | 0.00 | 0.00 |
| HO | OH | P  | O2 | 3 | -18.63 | 3.79   | -29.28 | 14.84  | 0.00 | 0.00 |
| HO | OH | P  | OS | 3 | -16.90 | 29.30  | -39.86 | -12.40 | 0.00 | 0.00 |

SET10 (M, Q0, G-3)-----RMSD= 1.1030 kJ/mol

|    |    |    |    |   |        |        |        |        |      |      |
|----|----|----|----|---|--------|--------|--------|--------|------|------|
| CT | OS | P  | OS | 3 | 31.55  | -20.75 | -35.54 | -10.80 | 0.00 | 0.00 |
| CT | OS | P  | OH | 3 | 32.49  | -32.13 | -32.70 | -0.36  | 0.00 | 0.00 |
| CT | OS | P  | O2 | 3 | 35.63  | -34.43 | -23.98 | -1.20  | 0.00 | 0.00 |
| HC | CT | OS | P  | 3 | 39.73  | -39.21 | 3.34   | -0.16  | 0.00 | 0.00 |
| HO | OH | P  | O2 | 3 | -87.20 | 101.40 | -39.12 | -14.20 | 0.00 | 0.00 |
| HO | OH | P  | OS | 3 | -86.56 | 84.04  | -55.72 | 2.52   | 0.00 | 0.00 |

SET11 (M, Q0, L-4)-----RMSD= 1.2780 kJ/mol

|    |    |    |    |   |       |        |        |        |        |      |
|----|----|----|----|---|-------|--------|--------|--------|--------|------|
| CT | OS | P  | OS | 3 | 5.43  | -36.05 | -27.12 | 27.40  | -12.88 | 0.00 |
| CT | OS | P  | OH | 3 | 7.19  | -45.07 | -27.78 | 35.24  | -10.56 | 0.00 |
| CT | OS | P  | O2 | 3 | 31.08 | 31.16  | -3.00  | -68.12 | -23.52 | 0.00 |
| HC | CT | OS | P  | 3 | 0.48  | 3.82   | 21.52  | 0.32   | 18.48  | 0.00 |
| HO | OH | P  | O2 | 3 | -4.90 | -7.56  | -98.78 | 29.68  | 68.88  | 0.00 |
| HO | OH | P  | OS | 3 | -3.66 | 35.50  | -83.52 | -20.92 | 43.68  | 0.00 |

SET12 (M, Q0, G-4)-----RMSD= 1.0600 kJ/mol

|    |    |    |    |   |        |        |        |        |        |      |
|----|----|----|----|---|--------|--------|--------|--------|--------|------|
| CT | OS | P  | OS | 3 | 14.01  | -25.01 | -23.06 | 4.36   | -26.56 | 0.00 |
| CT | OS | P  | OH | 3 | 13.67  | -33.17 | -14.78 | 11.60  | -31.6  | 0.00 |
| CT | OS | P  | O2 | 3 | 20.37  | -6.99  | 18.28  | -25.84 | -49.84 | 0.00 |
| HC | CT | OS | P  | 3 | 54.23  | -50.89 | -8.94  | -0.28  | 12.24  | 0.00 |
| HO | OH | P  | O2 | 3 | -68.67 | 106.33 | -74.38 | -28.12 | 38.16  | 0.00 |
| HO | OH | P  | OS | 3 | -77.28 | 74.66  | -77.92 | 9.16   | 26.16  | 0.00 |

-----  
 SET TYPE 4

SET13 (M, M, L-3)-----RMSD= 1.6160 kJ/mol  
 CT OS P OS 3 5.63 -37.79 -35.80 32.16 0.00 0.00  
 CT OS P OH 3 2.02 -45.90 -35.60 43.88 0.00 0.00  
 CT OS P O2 3 39.93 39.79 -25.58 -79.72 0.00 0.00  
 HC CT OS P 3 19.95 -20.15 1.92 0.20 0.00 0.00  
 HO OH P O2 3 -16.14 -2.86 -29.38 19.00 0.00 0.00  
 HO OH P OS 3 -16.28 31.16 -40.00 -14.88 0.00 0.00

SET14 (M, M, G-3)-----RMSD= 1.2620 kJ/mol  
 CT OS P OS 3 41.85 -25.97 -34.14 -15.88 0.00 0.00  
 CT OS P OH 3 39.50 -33.82 -31.86 -5.68 0.00 0.00  
 CT OS P O2 3 46.18 -53.66 -23.64 7.48 0.00 0.00  
 HC CT OS P 3 40.94 -40.62 -7.62 -0.32 0.00 0.00  
 HO OH P O2 3 -102.88 112.68 -31.12 -9.80 0.00 0.00  
 HO OH P OS 3 -101.91 101.31 -45.42 0.60 0.00 0.00

SET15 (M, M, L-4)-----RMSD= 1.4680 kJ/mol  
 CT OS P OS 3 -0.74 -39.92 -16.72 34.84 -23.28 0.00  
 CT OS P OH 3 -1.47 -43.97 -19.74 40.56 -19.52 0.00  
 CT OS P O2 3 29.40 39.40 14.22 -79.20 -41.6 0.00  
 HC CT OS P 3 4.14 0.50 19.64 0.44 20.32 0.00  
 HO OH P O2 3 2.43 -12.31 -115.94 31.36 85.92 0.00  
 HO OH P OS 3 -0.85 36.69 -94.24 -22.28 54.24 0.00

SET16 (M, M, G-4)-----RMSD= 1.2170 kJ/mol  
 CT OS P OS 3 19.90 -31.33 -18.44 3.72 -30.88 0.00  
 CT OS P OH 3 16.56 -35.42 -11.56 10.08 -35.12 0.00  
 CT OS P O2 3 28.16 -17.94 25.80 -24.60 -57.52 0.00  
 HC CT OS P 3 56.96 -52.64 -20.72 -0.48 15.36 0.00  
 HO OH P O2 3 -79.10 116.18 -72.16 -26.20 43.52 0.00  
 HO OH P OS 3 -89.22 88.28 -71.60 8.36 29.68 0.00

-----  
 The best RB parameters obtained from *fit\_dihedral.py* program: for type  
 set 1 (original vdW and Q0 charges) RMSD=2.623kJ/mol

CT OS P OS 3 -1.31 -1.67 -30.52 0.68 -9.20 0.00  
 CT OS P OH 3 2.75 1.93 -30.36 -6.60 -7.68 0.00  
 CT OS P O2 3 3.72 -4.02 -27.88 -0.44 -2.96 0.00  
 HC CT OS P 3 51.00 -15.52 -120.16 -2.68 131.20 0.00  
 HO OH P O2 3 54.19 27.23 -112.46 -55.24 104.72 0.00  
 HO OH P OS 3 17.88 -27.46 -72.46 27.48 71.60 0.00
